# Supplementary material for: Two-Dimensional Platinum Diselenide Waveguide-Integrated Infrared Photodetectors
Source: PubMed Central journal article supplement — ACS Photonics. 2022 Mar 4;9(3):859–67. doi: 10.1021/acsphotonics.1c01517 (PMC8931762; doi:10.1021/acsphotonics.1c01517), 2022-03-04
Supplement: ph1c01517_si_001.pdf [file ph1c01517_si_001.pdf]

# Supporting Information for “Two-dimensional Platinum Diselenide Waveguide-Integrated Infrared Photodetectors”

*Shayan Parhizkar<sup>1,2</sup>, Maximilian Pechtl<sup>3</sup>, Anna Lena Giesecke<sup>2</sup>, Stephan Suckow<sup>2,\*</sup>, Sophia Wahl<sup>4</sup>, Sebastian Lukas<sup>1</sup>, Oliver Hartwig<sup>3</sup>, Nour Negm<sup>1,2</sup>, Arne Quellmalz<sup>5</sup>, Kristinn Gylfason<sup>5</sup>, Daniel Schall<sup>2,6</sup>, Matthias Wuttig<sup>4</sup>, Georg S. Duesberg<sup>3</sup>, Max C. Lemme<sup>1,2,\*</sup>*

<sup>1</sup> Chair of Electronic Devices, RWTH Aachen University, Otto-Blumenthal-Str. 2, 52074 Aachen, Germany

<sup>2</sup> AMO GmbH, Advanced Microelectronic Center Aachen, Otto-Blumenthal-Str. 25, 52074 Aachen, Germany

<sup>3</sup> Institute of Physics, Faculty of Electrical Engineering and Information Technology (EIT 2) and Center for Integrated Sensor Systems, University of the Bundeswehr Munich, 85577 Neubiberg, Germany

<sup>4</sup> Institute of Physics IA, RWTH Aachen University, 52074 Aachen, Germany

<sup>5</sup> Division of Micro and Nanosystems, School of Electrical Engineering and Computer Science, KTH Royal Institute of Technology, SE-10044 Stockholm, Sweden

<sup>6</sup> Black Semiconductor GmbH, Schloss-Rahe-Str. 15, 52072 Aachen Germany

\*Email: suckow@amo.de, max.lemme@eld.rwth-aachen.de

## Thickness measurements of PtSe<sub>2</sub> films

Thicknesses of all PtSe<sub>2</sub> films were measured by atomic force microscopy (AFM) and they are shown in Fig. S1.

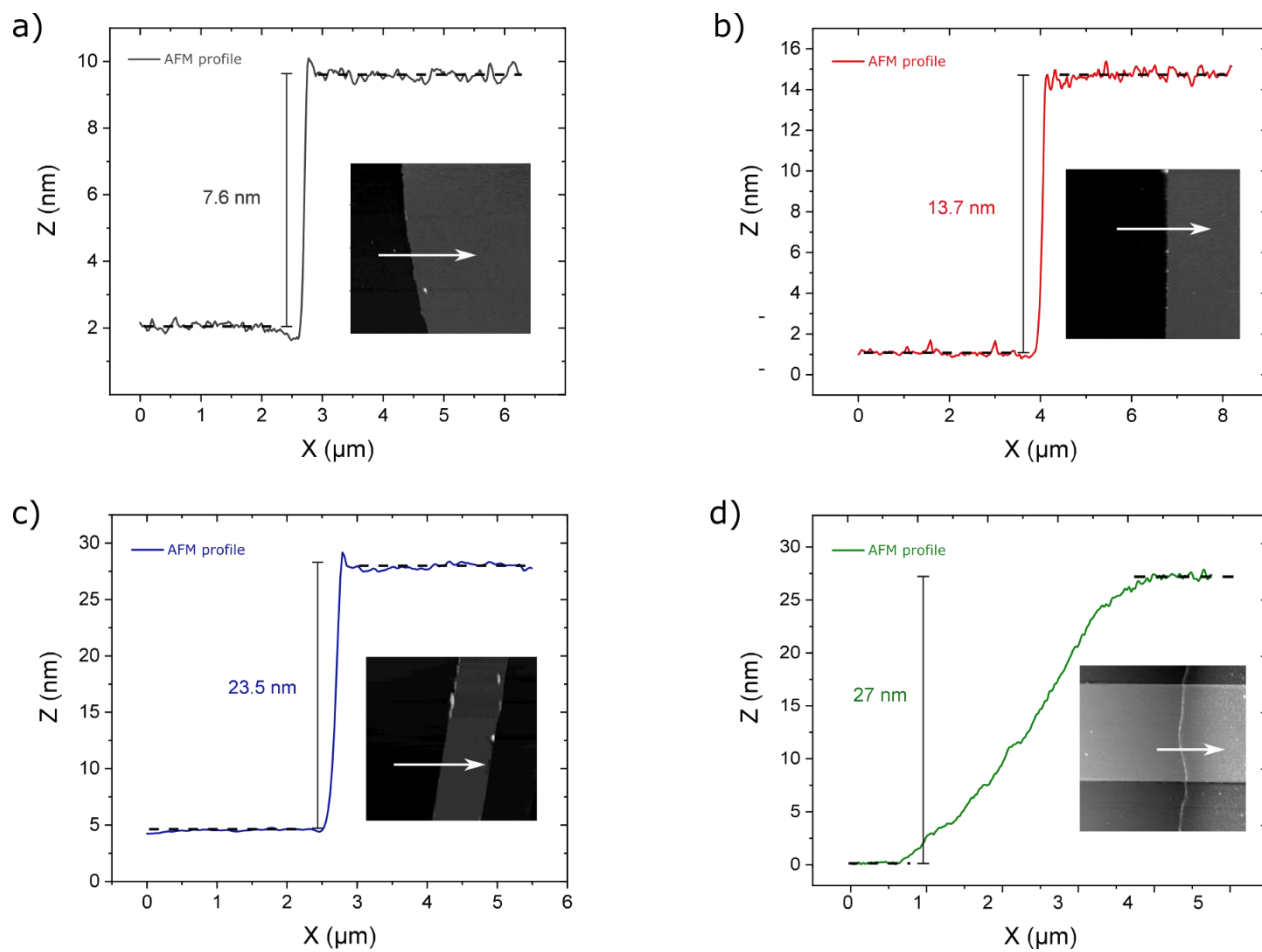

Figure S1. AFM Height measurements and corresponding AFM images of the PtSe<sub>2</sub> films.

## Opto-electrical measurement set up

To measure the photoresponse of the photodetectors we have used a manual set-up shown schematically in Fig. S2. Laser light of a diode laser at 1550 nm wavelength were modulated at 1 kHz frequency using an electro-optic modulator (Thorlabs LN81S-FC) and guided above the grating couplers of the samples using a single-mode fiber. Photovoltages of the photodetectors were measured using a lock-in amplifier (Zurich Instrument MFLI). The bias voltages were applied to the detectors using a source meter (Keithley 2400). Photocurrents were calculated by dividing the photovoltages of the detectors by the total resistance of them.

All measured photodetectors have the same dimensions, 50  $\mu\text{m}$  wide along the waveguide and 13  $\mu\text{m}$  long perpendicular to the waveguide.

For time resolved measurements, the output of the photodetectors was connected directly to an oscilloscope (Zurich Instrument MFLI).

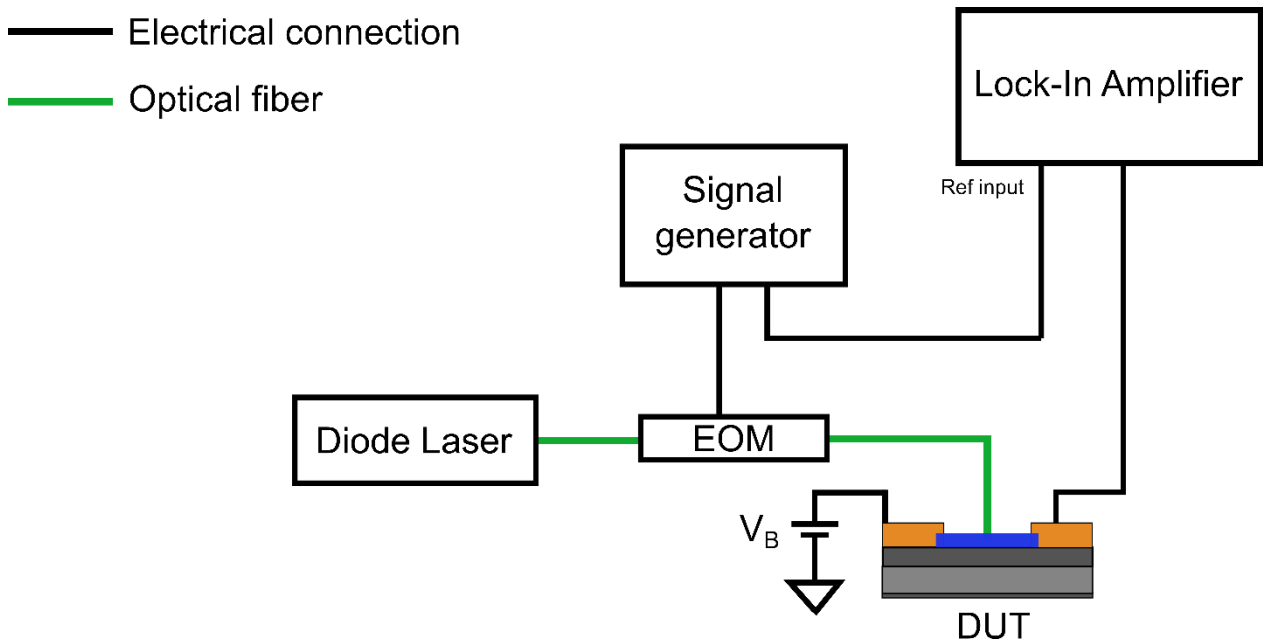

Figure S2. Schematic diagram of opto-electrical measurements set up.

## IV-Curve of PtSe<sub>2</sub> devices

$I_{ds}$ - $V_{ds}$  measurements have been carried out on all multilayer PtSe<sub>2</sub> devices. The IV diagrams exhibit almost linear characteristics for drain voltages ranging from -100 mV to 100 mV (Fig. 2b). This indicates near-ohmic contacts between the films and the Ni/Al electrodes. When the drain voltages are increased, deviations from the linear behavior can be observed more clearly which indicate the existence of Schottky barriers at the interfaces. The reason for the presence of Schottky barriers at the interfaces may be due to a mix of semi-metallic and semiconducting crystallites and is subject to further studies.<sup>1,2</sup>

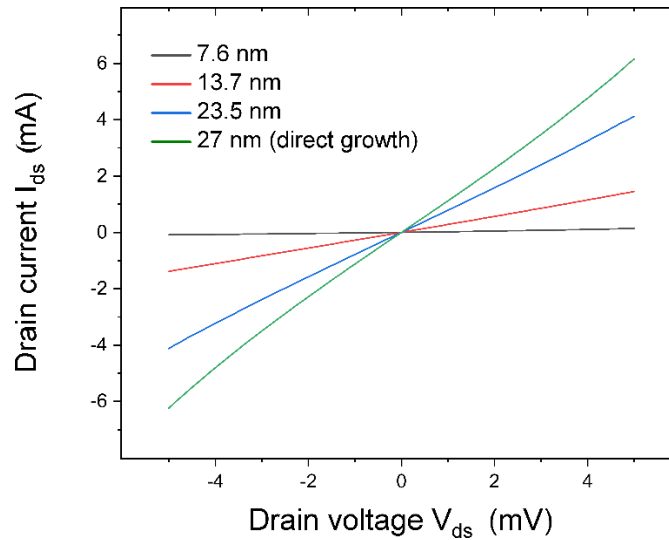

Figure S3. Drain current ( $I_{ds}$ ) as a function of drain-source voltage ( $V_{ds}$ ) for voltages ranging from -5 V to 5 V for all PtSe<sub>2</sub> devices.

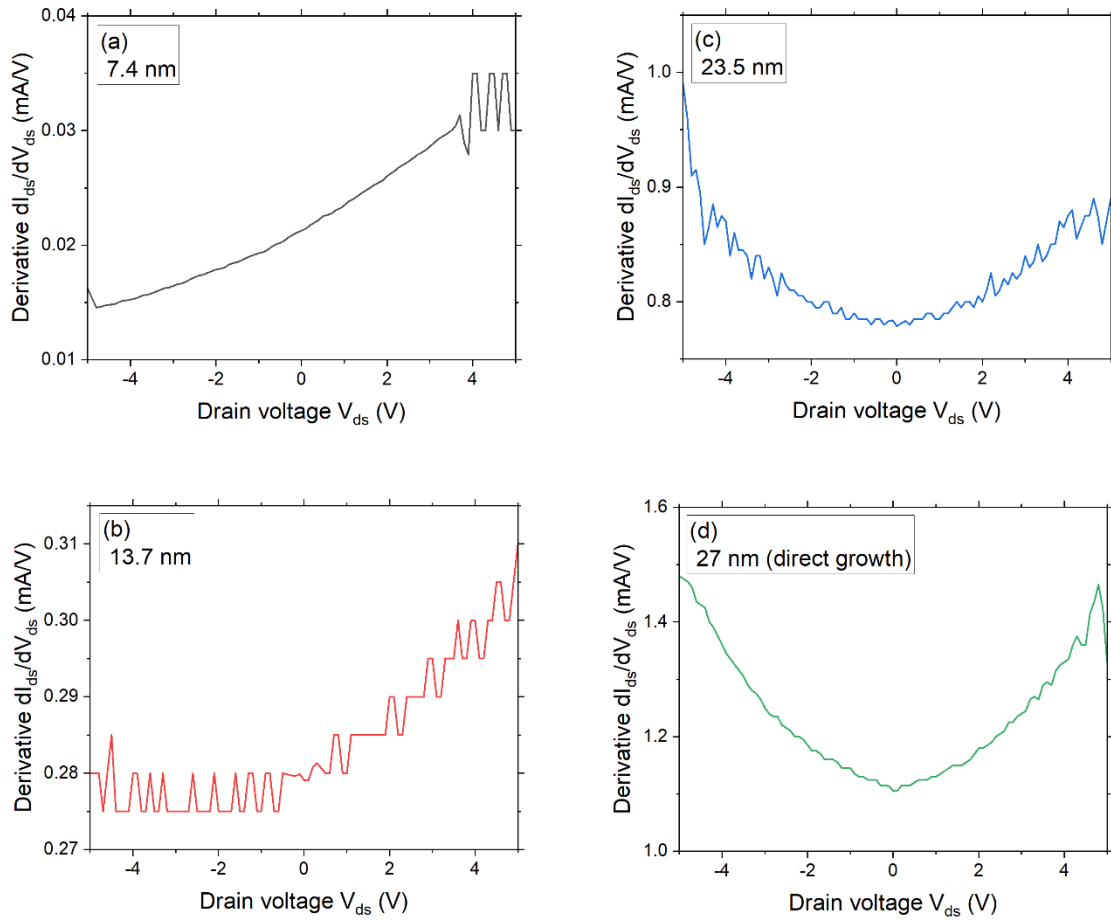

Figure S4. Derivatives of the drain current ( $I_{ds}$ ) as a function of drain-source voltage ( $V_{ds}$ ) for voltages ranging from -5 V to 5 V for all PtSe<sub>2</sub> devices revealing the non-linearity in the IV curves.

## References

- (1) Xie, J.; Zhang, D.; Yan, X.-Q.; Ren, M.; Zhao, X.; Liu, F.; Sun, R.; Li, X.; Li, Z.; Chen, S.; Liu, Z.-B.; Tian, J.-G. Optical Properties of Chemical Vapor Deposition-Grown PtSe<sub>2</sub> Characterized by Spectroscopic Ellipsometry. *2D Mater.* **2019**, *6* (3), 035011. <https://doi.org/10.1088/2053-1583/ab1490>.
- (2) Ansari, L.; Monaghan, S.; McEvoy, N.; Coileáin, C. Ó.; Cullen, C. P.; Lin, J.; Siris, R.; Stimpel-Lindner, T.; Burke, K. F.; Mirabelli, G.; Duffy, R.; Caruso, E.; Nagle, R. E.; Duesberg, G. S.; Hurley, P. K.; Gity, F. Quantum Confinement-Induced Semimetal-to-Semiconductor Evolution in Large-Area Ultra-Thin PtSe<sub>2</sub> Films Grown at 400 °C. *npj 2D Mater Appl* **2019**, *3* (1), 1–8. <https://doi.org/10.1038/s41699-019-0116-4>.
